# Supplementary material
Source: Research Square preprint supplement (doi:10.21203/rs.3.rs-8591155/v1)
Supplement: Supplementary file 1 [file 0932a0e1bd0482e14697ff92.docx]

**Table 8. Comparison of Clinical Variables Associated with Postoperative Intensive Care Unit Requirement**

|  | No ICU Admission (n=1622) | | ICU Admission (n=227) | | p value |
| --- | --- | --- | --- | --- | --- |
|  | Mean ± SD  Median (Min-Max)  (IQR) | | Mean ± SD  Median (Min-Max)  (IQR) | |  |
| Age | 36.93±15.24  32 (8-93); (26-45) | | 57.52±19.12  60 (18-93); (44-72) | | **<0.001 a** |
|  | **n** | **%** | **n** | **%** |  |
| Trauma/Emergency |  |  |  |  |  |
| Trauma | 279 | 16.0 | 74 | 30.8 | **<0.001 b** |
| Emergency | 1465 | 84.0 | 166 | 69.2 |
| Sex |  |  |  |  |  |
| Male | 692 | 39.7 | 154 | 64.4 | **<0.001 b** |
| Female | 1052 | 60.3 | 85 | 35.6 |
| ASA Classification |  |  |  |  |  |
| 1 | 222 | 12.7 | 7 | 2.9 | **<0.001 b** |
| 2 | 1215 | 69.7 | 33 | 13.8 |
| 3 | 273 | 15.7 | 109 | 45.4 |
| 4 | 29 | 1.7 | 70 | 29.2 |
| 5 | 5 | 0.3 | 21 | 8.8 |
| Vasopressor/Inotrope Use |  |  |  |  |  |
| No | 1739 | 99.7 | 193 | 80.4 | **<0.001 b** |
| Yes | 5 | 0.3 | 47 | 19.9 |
| Blood Transfusion |  |  |  |  |  |
| No | 1683 | 96.5 | 163 | 67.9 | **<0.001 b** |
| Yes | 61 | 3.6 | 77 | 32.1 |

Values are presented as mean ± SD or median (Q1, Q3) for continuous variables and number (percentage) for categorical variables. ASA: American Society of Anesthesiologists Physical Status Classification. ICU: Intensive Care Unit. A: Mann–Whitney U Test; B: Chi-Square Test or Fisher’s Exact Test.
