# Supplementary material
Source: Research Square preprint supplement (doi:10.21203/rs.3.rs-8591155/v1)
Supplement: Supplementary file 2 [file 279d8a883e13a26d8bb96e5c.docx]

**Table 7. Tranexamic Acid Administration Rates According to Transfusion Status**

|  | No Blood Transfusion | | Blood Transfusion | |
| --- | --- | --- | --- | --- |
|  | **n** | **%** | **n** | **%** |
| Tranexamic Acid |  |  |  |  |
| No | 1842 | 99.8 | 96 | 69.6 |
| Yes | 4 | 0.2 | 42 | 30.4 |

Values are presented as number (percentage).
