# Supplementary material
Source: Research Square preprint supplement (doi:10.21203/rs.3.rs-8591155/v1)
Supplement: Supplementary file 3 [file 360d778eda3aa82105a61517.docx]

**Table 5: Distribution of Postoperative Analgesia Methods Across Surgical Clinics**

|  | **General Surgery** | **Obstetrics & Gynecology** | **Orthopedics** | **Thoracic Surgery** | **Neurosurgery** | **Plastic Surgery** | |  | **Urology** | | --- | --- | | **Ophthalmology** | **ENT** | **Interventional Radiology** |
| --- | --- | --- | --- | --- | --- | --- | --- | --- | --- | --- | --- | --- |
|  | **n (%)** | **n (%)** | **n (%)** | **n (%)** | **n (%)** | **n (%)** | **n (%)** | **n (%)** | **n (%)** | **n (%)** |
| Postoperative Analgesia Management |  |  |  |  |  |  |  |  |  |  |
| None | 39 (5.2) | 17 (5.2) | 31 (11.4) | 4 (18.2) | 46 (37.1) | 4 (14.3) | 9 (25.0) | 6 (14.6) | 9 (69.2) | 10 (100) |
| Spinal | 15 (2.0) | 471 (71.5) | 54 (19.9) | 0 | 1 (0.8) | 2 (5.7) | 13 (36.1) | 0 | 0 | 0 |
| Intravenous | 613 (82.5) | 138 (20.9) | 131 (48.3) | 11 (50.0) | 76 (61.3) | 25 (71.4) | 11 (30.6) | 35 (85.4) | 4 (30.8) | 0 |
| PCA | 2 (0.3) | 7 (1.1) | 7 (2.6) | 1 (4.5) | 0 | 2 (5.7) | 0 | 0 | 0 | 0 |
| Nerve block | 12 (1.6) | 1 (0.2) | 33 (12.2) | 0 | 1 (0.8) | 1 (2.9) | 0 | 0 | 0 | 0 |
| Spinal + Intravenous | 0 | 5 (0.8) | 2 (0.7) | 0 | 0 | 0 | 1 (2.8) | 0 | 0 | 0 |
| Spinal + PCA | 0 | 0 | 1 (0.4) | 0 | 0 | 0 | 0 | 0 | 0 | 0 |
| Intravenous + PCA | 3 (0.4) | 1 (0.2) | 0 | 0 | 0 | 0 | 0 | 0 | 0 | 0 |
| Intravenous + Nerve block | 59 (7.9) | 19 (2.9) | 8 (3.0) | 6 (27.3) | 0 | 0 | 2 (5.6) | 0 | 0 | 0 |
| Spinal + Nerve block | 0 | 0 | 4 (1.5) | 0 | 0 | 0 | 0 | 0 | 0 | 0 |

Values are presented as number (percentage). PCA: Patient-Controlled Analgesia; ENT: Ear, Nose and Throat.
