# Supplementary material
Source: Research Square preprint supplement (doi:10.21203/rs.3.rs-8591155/v1)
Supplement: Supplementary file 4 [file 8705f95fd8df9e3b7ce83956.docx]

**Table 3. Distribution of Postoperative Analgesia, Hemodynamic Support, and Clinical Outcomes**

|  | **n** | **%** |
| --- | --- | --- |
| **Postoperative Pain Management** |  |  |
| No analgesia | 206 | 10.4 |
| Spinal | 556 | 28.0 |
| Intravenous | 1044 | 52.6 |
| PCA | 19 | 1.0 |
| Nerve block | 48 | 2.4 |
| Spinal + Intravenous | 8 | 0.4 |
| Spinal + PCA | 1 | 0.1 |
| Intravenous + PCA | 4 | 0.2 |
| Intravenous + Nerve block | 94 | 4.7 |
| Spinal + Nerve block | 4 | 0.2 |
| **Postoperative Opioid Use** |  |  |
| No opioid | 1081 | 54.5 |
| Aldolan | 846 | 42.6 |
| Morphine | 46 | 2.3 |
| Others | 11 | 0.6 |
| **Allergy/Anaphylaxis** |  |  |
| No | 1972 | 99.4 |
| Allergy | 12 | 0.6 |
| **Vasopressor/Inotrope Use** |  |  |
| No | 1932 | 97.4 |
| Yes | 52 | 2.6 |
| **Blood Transfusion** |  |  |
| No | 1846 | 93.0 |
| Yes | 138 | 7.0 |
| **Tranexamic Acid Use** |  |  |
| No | 1938 | 97.7 |
| Yes | 46 | 2.3 |
| **Arrest/CPR** |  |  |
| No | 1974 | 99.5 |
| Yes | 10 | 0.5 |
| **Mortality** |  |  |
| Alive | 1980 | 99.8 |
| Ex | 4 | 0.2 |
| **Postoperative ICU Admission** |  |  |
| No | 1744 | 87.9 |
| Yes | 240 | 12.1 |
| **NG Tube (n=697)** |  |  |
| No | 501 | 71.9 |
| Yes | 196 | 28.1 |

Values are presented as number (percentage). PCA: Patient-Controlled Analgesia; ICU: Intensive Care Unit; NG: Nasogastric; CPR: Cardiopulmonary Resuscitation.
