# Supplementary material
Source: Research Square preprint supplement (doi:10.21203/rs.3.rs-8591155/v1)
Supplement: Supplementary file 5 [file 88b6f85453346eca5ec48fd8.docx]

**Table 9. Multivariate Analysis of Independent Predictors of ICU Requirement**

| Variable | Regression Coefficient (SE) | Adj. OR | 95 % CI | | p value |
| --- | --- | --- | --- | --- | --- |
| Age | 0.027 (0.006) | 1.027 | 1.016 | 1.038 | <0.001 |
| Trauma | 0.474 (0.215) | 1.606 | 1.054 | 2.446 | 0.027 |
| ASA | 1.476 (0.147) | 4.376 | 3.281 | 5.837 | <0.001 |
| Vasopressor/Inotrope use | 3.195 (0.642) | 24.408 | 6.935 | 85.909 | <0.001 |
| Blood transfusion | 1.600 (0.262) | 4.952 | 2.964 | 8.273 | <0.001 |

Values are presented as regression coefficient (standard error), adjusted odds ratio, and 95% confidence interval. ICU: Intensive Care Unit; SE: Standard Error; OR: Odds Ratio; CI: Confidence Interval.
