# Supplementary material
Source: Research Square preprint supplement (doi:10.21203/rs.3.rs-8591155/v1)
Supplement: Supplementary file 6 [file b70086fefe3250e3aa1e1140.docx]

**Table 2. Intraoperative Anesthesia Management and Procedural Characteristics of Patients**

| **Variable** | **n** | **%** |
| --- | --- | --- |
| **Position (n=1983)** |  |  |
| Supine | 1896 | 95.6 |
| Prone | 39 | 2.0 |
| Lithotomy | 25 | 1.3 |
| Lateral | 16 | 0.8 |
| Others | 7 | 0.4 |
| **Anesthesia technique** |  |  |
| General | 1303 | 65.7 |
| Spinal | 577 | 29.1 |
| Combined | 14 | 0.7 |
| Nerve Block | 26 | 1.3 |
| Sedation | 62 | 3.1 |
| **Anesthesia technique (grouped)** |  |  |
| General | 1365 | 68.9 |
| Regional | 591 | 29.8 |
| Nerve Block | 26 | 1.3 |
| **Airway management** |  |  |
| Spontaneous breathing | 580 | 29.2 |
| Laryngeal Mask Airway (LMA) | 132 | 6.7 |
| Endotracheal Intubation | 1172 | 59.1 |
| Mask–Cannula | 99 | 5.0 |
| **Videolaryngoscopy (n=1979)** |  |  |
| Not used | 1800 | 91.0 |
| Used | 179 | 9.0 |
| **Peripheral IV access** |  |  |
| None | 43 | 2.2 |
| Hand | 756 | 38.1 |
| Arm | 689 | 34.7 |
| Foot | 1 | 0.1 |
| Multiple | 450 | 22.7 |
| Hand-Arm | 44 | 2.2 |
| Hand-Foot | 1 | 0.1 |
| **Arterial line** |  |  |
| None | 1690 | 85.2 |
| Radial | 282 | 14.2 |
| Femoral | 3 | 0.2 |
| Brachial | 8 | 0.4 |
| Other | 1 | 0.1 |
| **Central venous catheter** |  |  |
| None | 1787 | 90.1 |
| Internal Jugular | 176 | 8.9 |
| Subclavian | 10 | 0.5 |
| Femoral | 11 | 0.5 |

Values are presented as number (percentage). LMA: Laryngeal Mask Airway; IV: Intravenous.
