# Supplementary material
Source: Research Square preprint supplement (doi:10.21203/rs.3.rs-8591155/v1)
Supplement: Supplementary file 7 [file c01a4ec05047818df2de91a5.docx]

**Table 1. Demographic and Preoperative Clinical Characteristics of the Patients**

| **n=**1984 | Mean ± SD  Median (Min-Max) | |
| --- | --- | --- |
| **Age (years)** | 39.46±17.29  34 (8-83) | |
| **Operation time (min)** | 107.63±61.87  90 (0-520) | |
|  | **n** | **%** |
| **Sex** |  |  |
| Male | 846 | 42.7 |
| Female | 1137 | 57.3 |
| **Type of presentation** |  |  |
| Trauma | 353 | 17.8 |
| Non-trauma emergency | 1631 | 82.2 |
| **ASA** |  |  |
| 1 | 229 | 11.5 |
| 2 | 1248 | 62.9 |
| 3 | 382 | 19.3 |
| 4 | 99 | 5.0 |
| 5 | 26 | 1.3 |
| **Clinical department** |  |  |
| General Surgery | 743 | 37.4 |
| Obstetrics and Gynecology | 659 | 33.2 |
| Orthopedics and Traumatology | 271 | 13.7 |
| Thoracic Surgery | 22 | 1.1 |
| Neurosurgery | 124 | 6.3 |
| Plastic and Reconstructive Surgery | 35 | 1.8 |
| Urology | 36 | 1.8 |
| Ophthalmology | 41 | 2.1 |
| Otorhinolaryngology (ENT) | 13 | 0.7 |
| Other interventional specialties | 40 | 2.0 |
| **Urinary catheter (n=1983)** |  |  |
| Absent | 799 | 40.3 |
| Present | 1184 | 59.7 |
| **Urine output recorded (n=1983)** |  |  |
| Not recorded | 811 | 40.9 |
| Recorded | 1172 | 59.1 |

Values are presented as mean ± SD or median (Q1, Q3). ASA: American Society of Anesthesiologists physical status classification. ENT: Ear, Nose and Throat.
