# Supplementary material
Source: Research Square preprint supplement (doi:10.21203/rs.3.rs-8591155/v1)
Supplement: Supplementary file 8 [file f569fd3d12612d891b06fbcc.docx]

**Table 6. Distribution of Anesthesia Techniques by Clinical Departments**

|  | **General Surgery** | **Obstetrics & Gynecology** | **Orthopedics** | **Thoracic Surgery** | **Neurosurgery** | **Plastic Surgery** | |  | **Urology** | | --- | --- | | **Ophthalmology** | **ENT** | **Interventional Radiology** |
| --- | --- | --- | --- | --- | --- | --- | --- | --- | --- | --- | --- | --- |
|  | **n (%)** | **n (%)** | **n (%)** | **n (%)** | **n (%)** | **n (%)** | **n (%)** | **n (%)** | **n (%)** | **n (%)** |
| General anesthesia | 727 (98.0) | 170 (25.8) | 179 (66.3) | 22 (100) | 123 (99.2) | 31 (88.56) | 19 (52.8) | 41 (100) | 13 (100) | 40 (100) |
| Regional anesthesia | 14 (1.9) | 488 (74.1) | 69 (25.6) | 0 | 0 | 3 (8.6) | 17 (47.2) | 0 | 0 | 0 |
| Nerve block | 1 (0.1) | 1 (0.2) | 22 (8.1) | 0 | 1 (0.8) | 1 (2.9) | 0 | 0 | 0 | 0 |

Values are presented as number (percentage). ENT: Ear, Nose and Throat.
