# Supplementary material
Source: Research Square preprint supplement (doi:10.21203/rs.3.rs-8591155/v1)
Supplement: Supplementary file 9 [file f6861ee53ea91179a8b1d6d9.docx]

**Table 4. Distribution of Perioperative and Postoperative Characteristics of Patients by Clinical**

|  | | **General Surgery** | | **Obstetrics & Gynecology** | | **Orthopedics** | | **Thoracic Surgery** | | **Neurosurgery** | | **Plastic Surgery** | | |  | **Urology** | | --- | --- | | | **Ophthalmology** | | **ENT** | | **Interventional Radiology** | |
| --- | --- | --- | --- | --- | --- | --- | --- | --- | --- | --- | --- | --- | --- | --- | --- | --- | --- | --- | --- | --- | --- | --- | --- |
|  | | **n (%)** | | **n (%)** | | **n (%)** | | **n (%)** | | **n (%)** | | **n (%)** | | **n (%)** | | **n (%)** | | **n (%)** | | **n (%)** | |
| **Postop ICU** | |  | |  | |  | |  | |  | |  | |  | |  | |  | |  | |
| No | | 656 (88.3) | | 648 (98.3) | | 253 (93.4) | | 17  (77.3) | | 45 (36.3) | | 33 (94.3) | | 32 (88.9) | | 36 (87.8) | | 4 (30.8) | | 20 (50) | |
| Yes | | 87 (11.7) | | 11  (1.7) | | 18  (6.6) | | 5  (22.7) | | 79 (63.7) | | 2 (5.7) | | 4 (11.1) | | 5 (12.2) | | 9 (69.2) | | 20 (50) | |
| **Arrest/CPR** | |  | |  | |  | |  | |  | |  | |  | |  | |  | |  | |
| No | | 742 (99.9) | | 654 (99.2) | | 271 (100) | | 21 (95.5) | | 122 (98.4) | | 35 (100) | | 36 (100) | | 41 (100) | | 12 (92.3) | | 40 (100) | |
| Yes | | 1 (0.1) | | 5 (0.8) | | 0 | | 1 (4.5) | | 2 (1.2) | | 0 | | 0 | | 0 | | 1 (7.7) | | 0 | |
| **Blood transfusion** | |  | |  | |  | |  | |  | |  | |  | |  | |  | |  | |
| No | | 701 (94.3) | | 637 (96.7) | | 249 (91.9) | | 15 (68.2) | | 92 (74.2) | | 34 (97.1) | | 30 (83.3) | | 39 (95.1) | | 11 (84.6) | | 38 (95.0) | |
| Yes | | 42 (5.7) | | 22 (3.3) | | 22 (8.1) | | 7 (31.8) | | 32 (25.8) | | 1 (2.9) | | 6 (16.7) | | 2 (4.9) | | 2 (15.4) | | 2 (5.0) | |
| **Allergy** | |  | |  | |  | |  | |  | |  | |  | |  | |  | |  | |
| No | | 439 (99.5) | | 655 (99.4) | | 270 (99.6) | | 21 (95.5) | | 124 (100) | | 35 (100) | | 34 (94.4) | | 41 (100) | | 13 (100) | | 40 (100) | |
| Yes | | 4 (0.5) | | 4 (0.6) | | 1 (0.4) | | 1 (4.5) | | 0 | | 0 | | 2 (5.6) | | 0 | | 0 | | 0 | |
| **Central line** | |  | |  | |  | |  | |  | |  | |  | |  | |  | |  | |
| No | | 659 (88.3) | | 643 (97.6) | | 243 (89.7) | | 12 (54.5) | | 87 (70.2) | | 25 (71.4) | | 34 (94.4) | | 39 (95.1) | | 10 (76.9) | | 38 (95.0) | |
| Yes | | 87 (11.7) | | 16 (2.4) | | 28 (10.3) | | 10 (45.5) | | 37 (29.8) | | 10 (28.6) | | 2 (5.6) | | 2 (4.9) | | 3 (23.3) | | 2 (5.0) | |
| **Arterial line** | |  | |  | |  | |  | |  | |  | |  | |  | |  | |  | |
| No | | 618 (83.2) | | 639 (97.0) | | 246 (90.8) | | 7 (31.8) | | 38 (30.6) | | 31 (88.6) | | 31 (86.1) | | 40 (97.6) | | 10 (76.9) | | 30 (75.0) | |
| Yes | | 125 (16.8) | | 20 (3.0) | | 25 (9.2) | | 15 (68.2) | | 86 (69.4) | | 4 (11.4) | | 5 (13.9) | | 1 (2.4) | | 3 (23.1) | | 10 (25.0) | |
| **NG tube** | |  | |  | |  | |  | |  | |  | |  | |  | |  | |  | |
| No | | 161 (46.9) | | 177 (95.7) | | 73 (98.6) | | 6 (100) | | 39 (92.9) | | 8 (100) | | 11 (100) | | 6 (100) | | 3 (75.0) | | 17 (94.4) | |
| Yes | | 182 (53.1) | | 8 (4.3) | | 1 (1.4) | | 0 | | 3 (7.1) | | 0 | | 0 | | 0 | | 1 (25.0 | | 1 (5.6) | |
| **Video laryngoscope** | |  | |  | |  | |  | |  | |  | |  | |  | |  | |  | |
| No | | 662 (89.1) | | 628 (95.3) | | 255 (94.1) | | 16 (76.2) | | 93 (76.9) | | 31 (88.6) | | 32 (91.4) | | 10 (97.6) | | 6 (46.2) | | 37 (92.5) | |
| Yes | | 81 (10.9) | | 31 (4.7) | | 16 (5.9) | | 5 (23.8) | | 28 (23.1) | | 4 (11.4) | | 3 (8.6) | | 1 (2.4) | | 7 (53.8) | | 3 (7.5) | |
| **Vasopressor/Inotrope** | |  | |  | |  | |  | |  | |  | |  | |  | |  | |  | |
| No | | 724 (97.4) | | 653 (99.1) | | 270 (99.6) | | 17 (77.3) | | 110 (88.7) | | 34 (97.1) | | 32 (88.9) | | 41 (100) | | 12 (92.3) | | 39 (97.5) | |
| Yes | | 19 (2.6) | | 6 (0.9) | | 1 (0.4) | | 5 (22.7) | | 14 (11.3) | | 1 (2.9) | | 4 (11.1) | | 0 | | 1 (7.7) | | 1 (2.5) | |
| **Mortality** | |  | |  | |  | |  | |  | |  | |  | |  | |  | |  | |
| No | | 742 (99.9) | | 657 (99.7) | | 271 (100) | | 21 (95.5) | | 124 (100) | | 35 (100) | | 36 (100) | | 41 (100) | | 13 (100) | | 40 (100) | |
| Yes | | 1 (0.1) | | 2 (0.3) | | 0 | | 1 (4.5) | | 0 | | 0 | | 0 | | 0 | | 0 | | 0 | |

Values are presented as number (percentage). ICU: Intensive Care Unit; CPR: Cardiopulmonary Resuscitation; NG: Nasogastric; ENT: Ear, Nose and Throat.
